# Supplementary figures and images for: Characterization of CRISPR-Cas Systems in Serratia marcescens Isolated from Rhynchophorus ferrugineus (Olivier, 1790) (Coleoptera: Curculionidae)
Source: MDPI journal article supplement (doi:10.3390/microorganisms7090368), 2019-09-19

# I-E subtype

CAV1492 (39 DRs)  
CAV1761

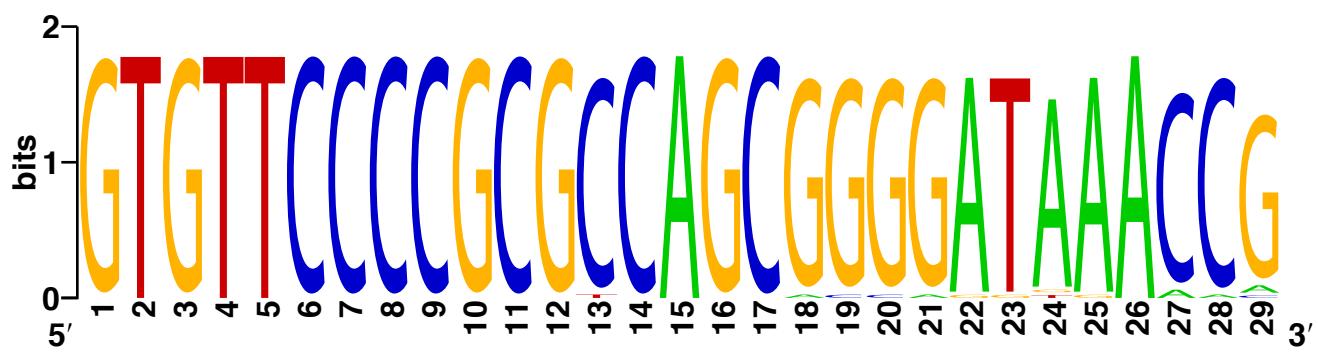

KS10  
EL1 (24 DRs)

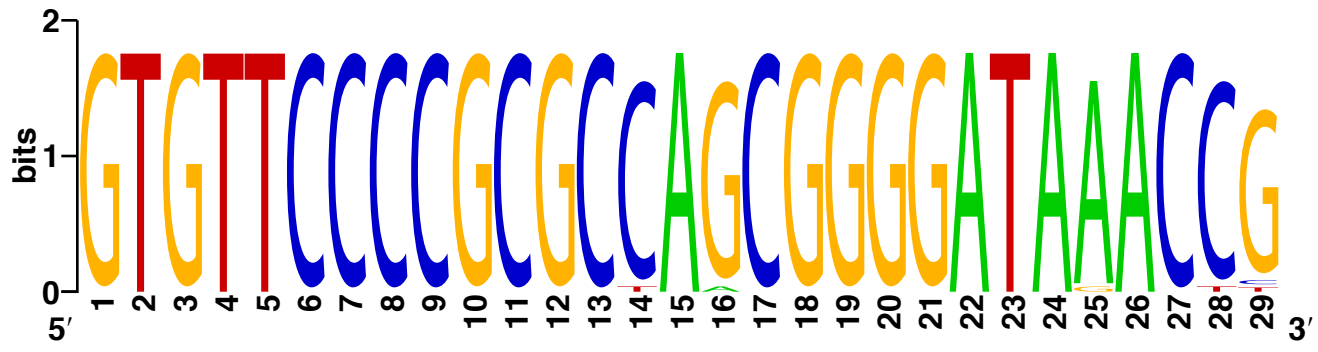

S8 (31 DRs)

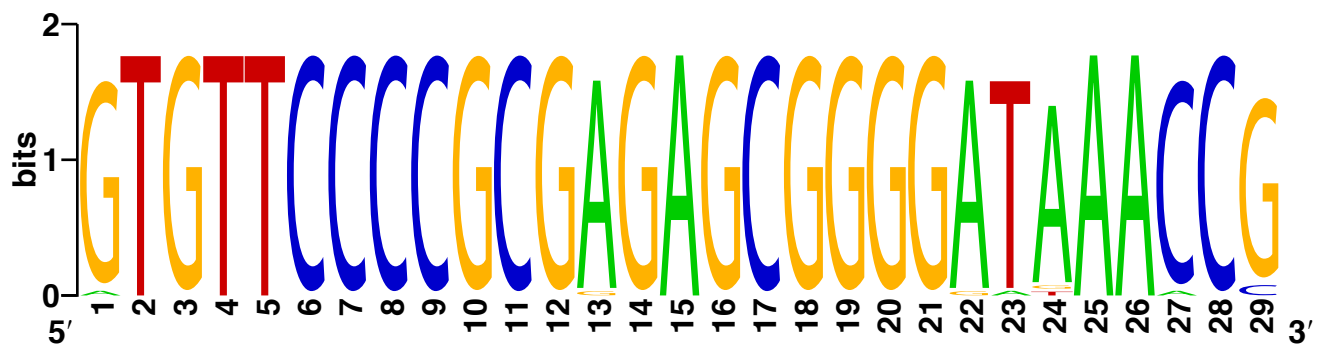

S8 (11 DRs)

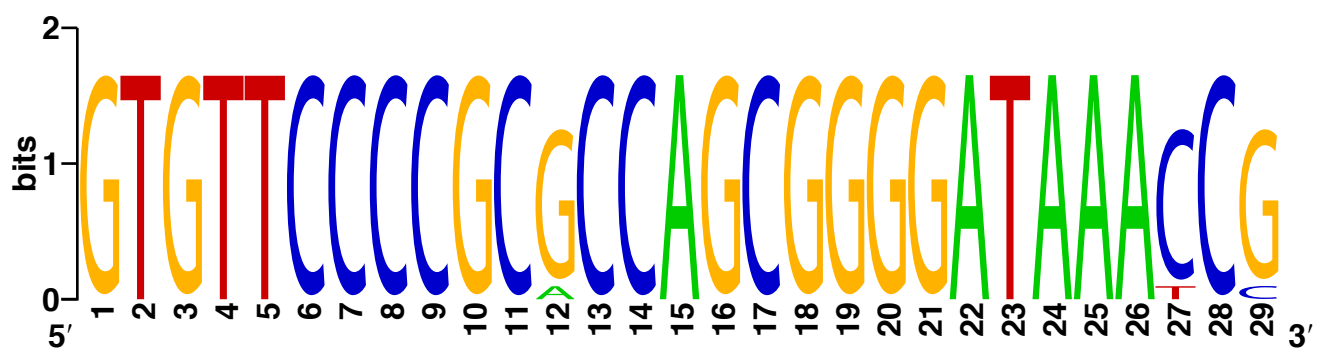

S8 (30 DRs)

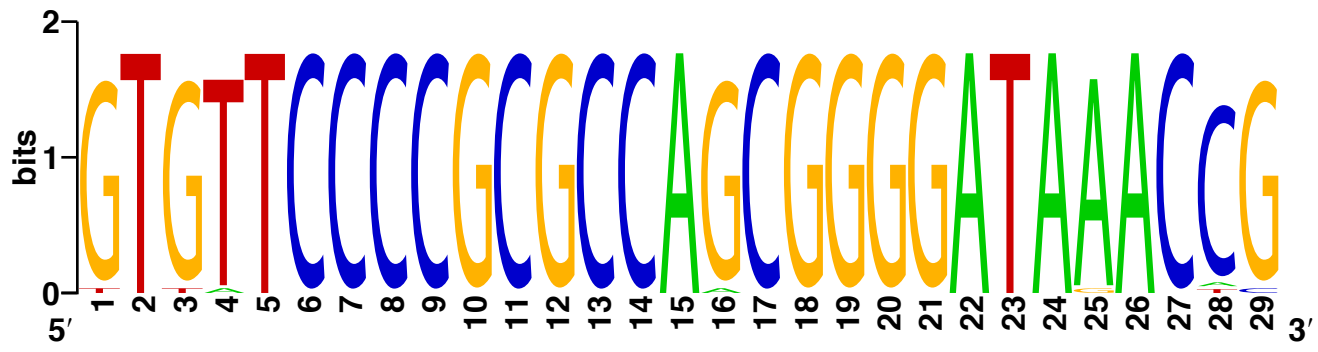

Supplement: s1 [file s1]

# I-F subtype

12TM (26 DRs)

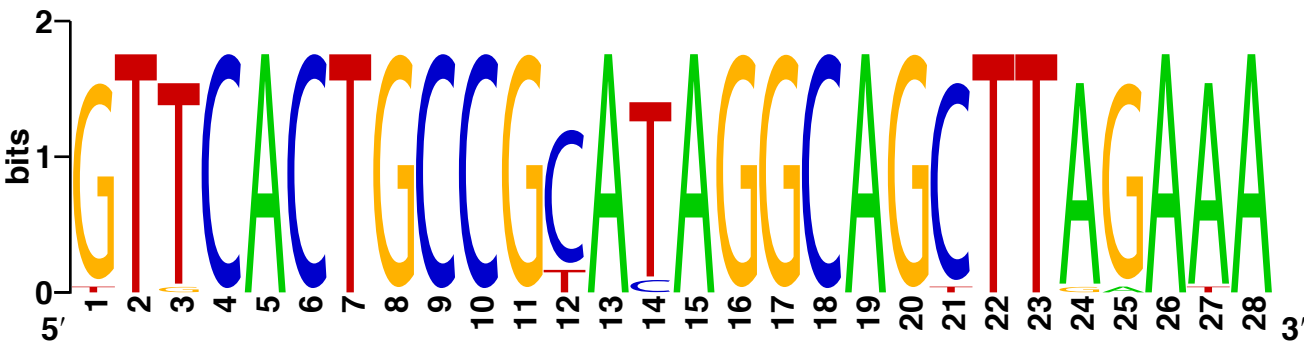

12TM (28 DRs)

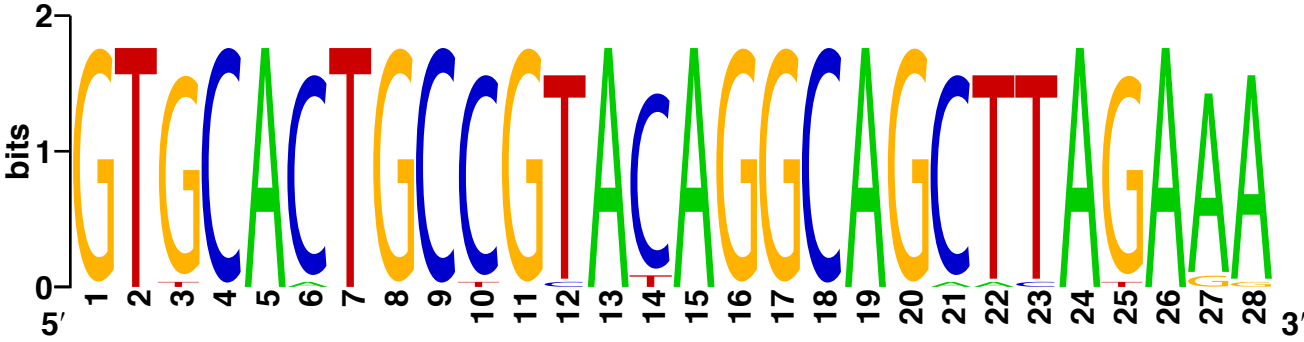

B3R3 (14 DRs)

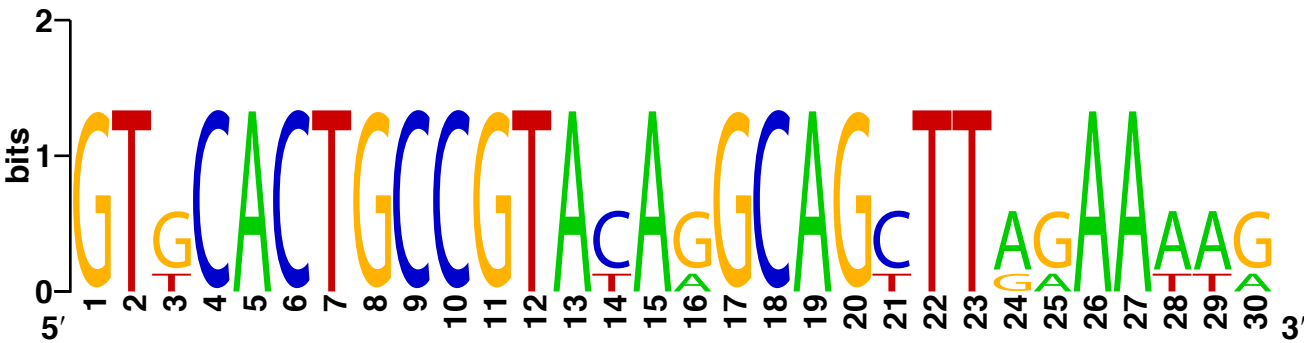

N4-5 (9 DRs)

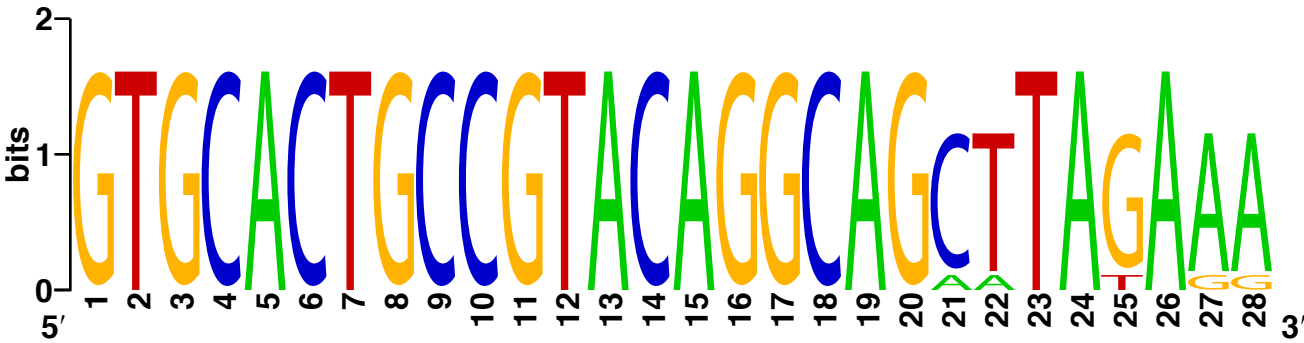

N4-5 (18 DRs)

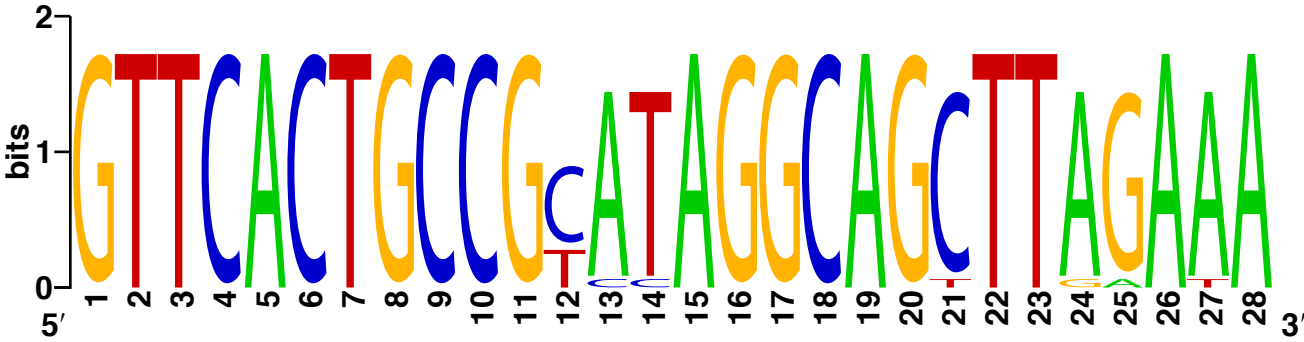

PWN146 (7 DRs)

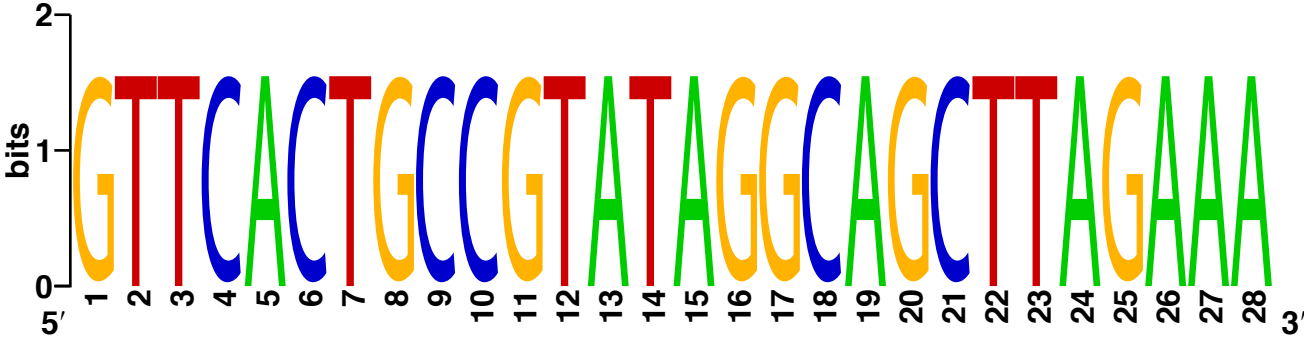

PWN146 (47 DRs)

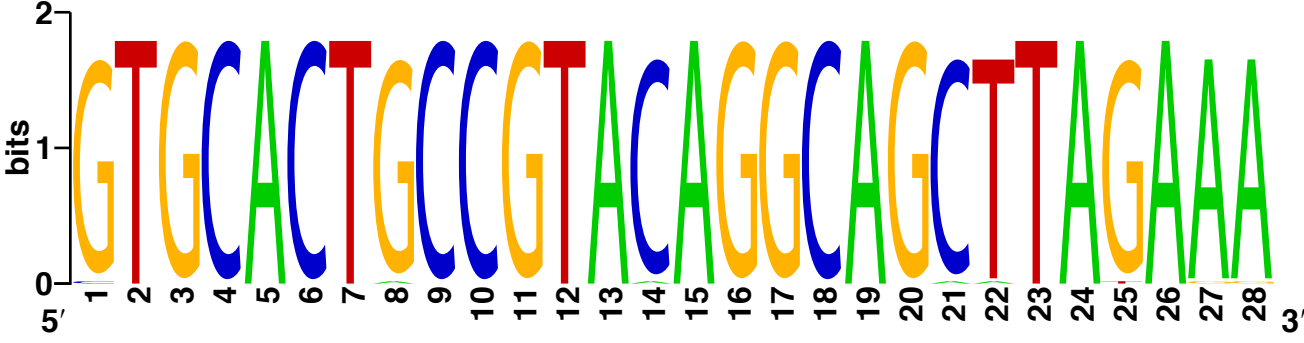

S5 (4 DRs)

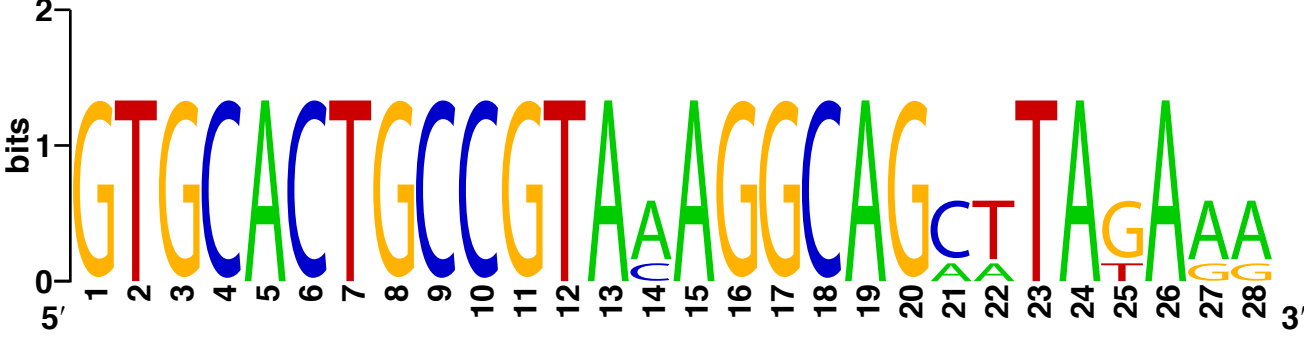

S5 (51 DRs)

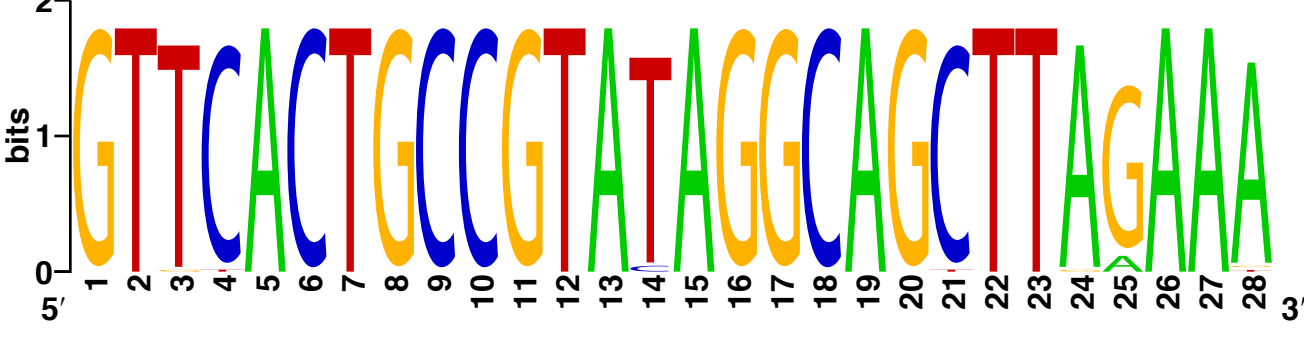

Supplement: s1 [file s1]
